# Supplementary material for: Interplay of Gene Expression Noise and Ultrasensitive Dynamics Affects Bacterial Operon Organization
Source: PubMed Central journal article supplement (PMC3431296; doi:10.1371/journal.pcbi.1002672), 2012-08-30
Supplement: pcbi.1002672.s006.pdf [file pcbi.1002672.s006.pdf]

**Table S1.** Predicted level of decorrelation between proteins that are uncoupled, cotranscribed, or cotranslated, with or without transcriptional bursting

| Average expression level (#/cell) | Without transcriptional bursting |               |              | With transcriptional bursting |               |              |
|-----------------------------------|----------------------------------|---------------|--------------|-------------------------------|---------------|--------------|
|                                   | Uncoupled                        | Cotranscribed | Cotranslated | Uncoupled                     | Cotranscribed | Cotranslated |
| 52                                | 0.29                             | 0.019         | 0.0096       | 0.66                          | 0.19          | 0.0094       |
| 534                               | 0.026                            | 0.0018        | 0.00091      | 0.38                          | 0.0019        | 0.00094      |
| 5226                              | 0.0028                           | 0.00019       | 0.000092     | 0.35                          | 0.00019       | 0.000092     |
