# Supplementary material for: Interplay of Gene Expression Noise and Ultrasensitive Dynamics Affects Bacterial Operon Organization
Source: PubMed Central journal article supplement (PMC3431296; doi:10.1371/journal.pcbi.1002672), 2012-08-30
Supplement: pcbi.1002672.s008.pdf [file pcbi.1002672.s008.pdf]

**Table S3.** Mathematical models used for linear noise approximation of five simple network motifs in the form  $\frac{d\bar{y}}{dt} = \mathbf{R}$ . For species  $m_i$ ,  $i = 1$  in the coupled form and 2 in the uncoupled form.

| Model                      | $\bar{y}^*$                                                                                                          | $\mathbf{R}$                                                                                                                                                                                                                                                                                                                                                                                                             |
|----------------------------|----------------------------------------------------------------------------------------------------------------------|--------------------------------------------------------------------------------------------------------------------------------------------------------------------------------------------------------------------------------------------------------------------------------------------------------------------------------------------------------------------------------------------------------------------------|
| Gene expression            | $\begin{bmatrix} \langle m_1 \rangle \\ \langle A \rangle \\ \langle m_2 \rangle \\ \langle B \rangle \end{bmatrix}$ | $\begin{bmatrix} k_m - k_{mdeg} \langle m_1 \rangle \\ k_{tsn} \langle m_1 \rangle - k_{deg} \langle A \rangle \\ k_m - k_{mdeg} \langle m_2 \rangle \\ k_{tsn} \langle m_2 \rangle - k_{deg} \langle B \rangle \end{bmatrix}$                                                                                                                                                                                           |
| Linear metabolic pathway   | $\begin{bmatrix} \langle A \rangle \\ \langle B \rangle \\ \langle I \rangle \\ \langle P \rangle \end{bmatrix}$     | $\begin{bmatrix} k_{tsn} \langle m_1 \rangle - k_{deg} \langle A \rangle \\ k_{tsn} \langle m_1 \rangle - k_{deg} \langle B \rangle \\ v_1 \langle A \rangle - v_2 \frac{\langle I \rangle \langle B \rangle}{K_m + \langle I \rangle} - k_{deg} \langle I \rangle \\ v_2 \frac{\langle I \rangle \langle B \rangle}{K_m + \langle I \rangle} - k_u \langle P \rangle \end{bmatrix}$                                     |
| Redundant metabolic step   | $\begin{bmatrix} \langle A \rangle \\ \langle B \rangle \\ \langle P \rangle \end{bmatrix}$                          | $\begin{bmatrix} k_{tsn} \langle m_1 \rangle - k_{deg} \langle A \rangle \\ k_{tsn} \langle m_1 \rangle - k_{deg} \langle B \rangle \\ v_1 \langle A \rangle + v_2 \langle B \rangle - k_u \langle P \rangle \end{bmatrix}$                                                                                                                                                                                              |
| Metabolic branch point     | $\begin{bmatrix} \langle S \rangle \\ \langle A \rangle \\ \langle B \rangle \end{bmatrix}$                          | $\begin{bmatrix} k_{in} - k_1 \frac{\langle S \rangle \langle A \rangle}{K_m + \langle A \rangle} - k_2 \frac{\langle S \rangle \langle B \rangle}{K_m + \langle B \rangle} - k_{deg} \langle S \rangle \\ k_{tsn} \langle m_1 \rangle - k_{deg} \langle A \rangle \\ k_{tsn} \langle m_1 \rangle - k_{deg} \langle B \rangle \end{bmatrix}$                                                                             |
| Covalent modification      | $\begin{bmatrix} \langle A \rangle \\ \langle B \rangle \\ \langle AB \rangle \\ \langle A^* \rangle \end{bmatrix}$  | $\begin{bmatrix} k_{tsn} \langle m_1 \rangle - k_b \langle A \rangle \langle B \rangle - k_{deg} \langle A \rangle \\ k_{tsn} \langle m_1 \rangle - k_b \langle A \rangle \langle B \rangle + k_p \langle AB \rangle - k_{deg} \langle B \rangle \\ k_b \langle A \rangle \langle B \rangle - k_p \langle AB \rangle - k_{deg} \langle AB \rangle \\ k_p \langle AB \rangle - k_{deg} \langle A^* \rangle \end{bmatrix}$ |
| Multiple gene regulators   | $\begin{bmatrix} \langle A \rangle \\ \langle B \rangle \\ \langle m_p \rangle \\ \langle P \rangle \end{bmatrix}$   | $\begin{bmatrix} k_{tsn} \langle m_1 \rangle - k_{deg} \langle A \rangle \\ k_{tsn} \langle m_1 \rangle - k_{deg} \langle B \rangle \\ k_{mpb} + k_{mp} \frac{\langle A \rangle + \langle B \rangle}{K_m + \langle A \rangle + \langle B \rangle} - k_{mdeg} \langle m_p \rangle \\ k_{tsnp} \langle m_p \rangle - k_{deg} \langle P \rangle \end{bmatrix}$                                                              |
| Stoichiometric interaction | $\begin{bmatrix} \langle A \rangle \\ \langle B \rangle \\ \langle AB \rangle \end{bmatrix}$                         | $\begin{bmatrix} k_{tsn} \langle m_1 \rangle - k_b \langle A \rangle \langle B \rangle + k_d \langle AB \rangle - k_{deg} \langle A \rangle \\ k_{tsn} \langle m_1 \rangle - k_b \langle A \rangle \langle B \rangle + k_d \langle AB \rangle - k_{deg} \langle B \rangle \\ k_b \langle A \rangle \langle B \rangle - k_d \langle AB \rangle - k_{deg} \langle AB \rangle \end{bmatrix}$                                |

\*Variable definitions:  $m_1, m_2, m_p$ : mRNA.  $A, B$ : expressed proteins.  $AB$ : protein complex.  $A^*$ : Modified form of  $A$ .  $S, I$ : metabolic substrate and intermediates.  $P$ : metabolic product, or protein gene product in the Multiple Gene Regulator model.
