# Supplementary material for: Interplay of Gene Expression Noise and Ultrasensitive Dynamics Affects Bacterial Operon Organization
Source: PubMed Central journal article supplement (PMC3431296; doi:10.1371/journal.pcbi.1002672), 2012-08-30
Supplement: pcbi.1002672.s010.pdf [file pcbi.1002672.s010.pdf]

**Table S5.** Post-translational interactions in the linear and redundant metabolic step models. These reactions are combined with those from Table S4 to create uncoupled, transcriptionally coupled, and translationally coupled model forms.

| Linear metabolic pathway |                                |                             |                                             |
|--------------------------|--------------------------------|-----------------------------|---------------------------------------------|
| Reaction number          | Reaction *                     | Propensity **               | Parameter values                            |
| 1                        | $A + S \rightleftharpoons A.S$ | $k_1 A, k_{-1} A.S$         | $2 \text{ s}^{-1\dagger}, 2 \text{ s}^{-1}$ |
| 2                        | $A.S \rightarrow A + I$        | $k_{cat1} A.S$              | $1 \text{ s}^{-1}$                          |
| 3                        | $B + I \rightleftharpoons B.I$ | $k_2 B \cdot I, k_{-2} B.I$ | $2 \Omega/(\#\times s), 2 \text{ s}^{-1}$   |
| 4                        | $B.I \rightarrow B + P$        | $k_{cat2} B.I$              | $0.5; 1; 2 \text{ s}^{-1\dagger}$           |
| 5                        | $A.S \rightarrow \emptyset$    | $k_{deg} A.S$               | $0.0002 \text{ s}^{-1}$                     |
| 6                        | $B.I \rightarrow \emptyset$    | $k_{deg} B.I$               | $0.0002 \text{ s}^{-1}$                     |
| 7                        | $I \rightarrow \emptyset$      | $k_{deg} I$                 | $0.0002 \text{ s}^{-1}$                     |
| 8                        | $P \rightarrow \emptyset$      | $k_u P$                     | $2 \text{ s}^{-1}$                          |
| Redundant metabolic step |                                |                             |                                             |
| Reaction number          | Reaction *                     | Propensity **               | Parameter values                            |
| 1                        | $A + S \rightleftharpoons A.S$ | $k_1 A \cdot S, k_{-1} A.S$ | $2 \text{ s}^{-1\dagger}, 2 \text{ s}^{-1}$ |
| 2                        | $A.S \rightarrow A + P$        | $k_{cat1} A.S$              | $0.5; 1; 2 \text{ s}^{-1\dagger}$           |
| 3                        | $B + S \rightleftharpoons B.S$ | $k_2 B \cdot S, k_{-2} B.S$ | $2 \text{ s}^{-1\dagger}, 2 \text{ s}^{-1}$ |
| 4                        | $B.S \rightarrow B + P$        | $k_{cat2} B.S$              | $0.5; 1; 2 \text{ s}^{-1\dagger}$           |
| 5                        | $A.S \rightarrow \emptyset$    | $k_{deg} A.S$               | $0.0002 \text{ s}^{-1}$                     |
| 6                        | $B.S \rightarrow \emptyset$    | $k_{deg} B.S$               | $0.0002 \text{ s}^{-1}$                     |
| 7                        | $P \rightarrow \emptyset$      | $k_u P$                     | $2 \text{ s}^{-1}$                          |
| Metabolic branch point   |                                |                             |                                             |
| Reaction number          | Reaction *                     | Propensity                  | Parameter values                            |
| 1                        | $\rightarrow S$                | $k_{in}$                    | $4228.98 \text{ s}^{-1}$                    |
| 1                        | $A + S \rightleftharpoons A.S$ | $k_1 A \cdot S, k_{-1} A.S$ | $2 \text{ s}^{-1\dagger}, 2 \text{ s}^{-1}$ |
| 2                        | $A.S \rightarrow A$            | $k_{cat1} A.S$              | $0.5; 1; 6 \text{ s}^{-1\dagger}$           |
| 3                        | $B + S \rightleftharpoons B.S$ | $k_2 B \cdot S, k_{-2} B.S$ | $2 \text{ s}^{-1\dagger}, 2 \text{ s}^{-1}$ |
| 4                        | $B.S \rightarrow B$            | $k_{cat2} B.S$              | $0.5; 1; 6 \text{ s}^{-1\dagger}$           |
| 5                        | $A.S \rightarrow \emptyset$    | $k_{deg} A.S$               | $0.0002 \text{ s}^{-1}$                     |
| 6                        | $B.S \rightarrow \emptyset$    | $k_{deg} B.S$               | $0.0002 \text{ s}^{-1}$                     |

\*Variable definitions:  $A, B$ : metabolic enzymes;  $S$ : substrate;  $I$ : intermediate;  $P$ : product.

\*\*Unbound substrate  $S$  is held constant and subsumed into parameter  $k_1$ .

$\dagger k_1$  (and  $k_2$  in the redundant metabolic step only) is a composite parameter equal to  $[\text{precursor}] \times V_i$  where units of  $V_i$  are  $\Omega/(\#\times s)$ ;  $\Omega$  represents cell volume.

$\ddagger$ Multiple entries denote scan values for Figure S1. In the redundant step and branch point,  $k_{cat1}$  and  $k_{cat2}$  were varied simultaneously. Main text example used 1 for linear redundant pathway and 6 for metabolic branch point.
