# Supplementary material for: Interplay of Gene Expression Noise and Ultrasensitive Dynamics Affects Bacterial Operon Organization
Source: PubMed Central journal article supplement (PMC3431296; doi:10.1371/journal.pcbi.1002672), 2012-08-30
Supplement: pcbi.1002672.s012.pdf [file pcbi.1002672.s012.pdf]

**Table S7.** Detailed *lac* operon model.  $g^?$  denotes a promoter wildcard that can be on ( $g^*$ ) or off ( $g$ ).

| Reaction number | Reaction                                                                                                     | Propensity                                                                                                  |
|-----------------|--------------------------------------------------------------------------------------------------------------|-------------------------------------------------------------------------------------------------------------|
| 1               | $\rightarrow \text{mRNA}_{lacY} (g_{lacY}^*)$                                                                | $k_m g_{lacY}^*$                                                                                            |
| 2               | $\rightarrow \text{mRNA}_{lacZ} (g_{lacZ}^*)$                                                                | $k_m g_{lacZ}^*$                                                                                            |
| 3               | $\rightarrow \text{mRNA}_{lacI} (g_{lacI}^*)$                                                                | $k_{mI} g_{lacI}^*$                                                                                         |
| 4               | $\text{mRNA} \rightarrow \emptyset$                                                                          | $k_{mdeg} \text{mRNA}$                                                                                      |
| 5               | $\rightarrow \text{LacY} (\text{mRNA}_{lacY})$                                                               | $k_{tsn} \text{mRNA}_{lacY}$                                                                                |
| 6               | $\rightarrow \text{LacZ} (\text{mRNA}_{lacZ})$                                                               | $k_{tsn} \text{mRNA}_{lacZ}$                                                                                |
| 7               | $\rightarrow \text{LacI} (\text{mRNA}_{lacI})$                                                               | $k_{tsn} \text{mRNA}_{lacI}$                                                                                |
| 8               | $\text{LacY, Z, I, I}_2, \text{I}_4 \rightarrow \emptyset$                                                   | $k_{deg} \text{LacY, Z, I, I}_2, \text{I}_4$                                                                |
| 9               | $2 \text{LacI} \rightarrow \text{LacI}_2$                                                                    | $k_{lacI} \text{LacI} (\text{LacI} - 1)$                                                                    |
| 10              | $2 \text{LacI}_2 \rightarrow \text{LacI}_4$                                                                  | $k_{lacI} \text{LacI}_2 (\text{LacI}_2 - 1)$                                                                |
| 11              | $\text{LacY} \rightleftharpoons \text{LacY.lac}_e$                                                           | $k_{bl} \text{LacY}, k_{dl} \text{LacY.lac}_e$                                                              |
| 12              | $\text{LacY.lac}_e \rightarrow \text{LacY} + \text{lac}$                                                     | $k_{perm} \text{LacY.lac}_e$                                                                                |
| 13              | $\text{LacZ} + \text{lac} \rightleftharpoons \text{LacZ.lac}$                                                | $k_{bp} \text{LacZ}, k_{dp} \text{LacZ.lac}$                                                                |
| 14              | $\text{LacZ.lac} \rightleftharpoons \text{LacZ} + \text{alac}$                                               | $k_{dp2} \text{LacZ.lac}, k_{bp2} \text{LacZ} + \text{alac}$                                                |
| 15              | $\text{LacZ.lac} \rightarrow \text{LacZ} + \text{p}$                                                         | $k_{cat} \text{LacZ.lac}$                                                                                   |
| 16              | $\text{LacI}_4 + 2 \text{alac} \rightleftharpoons \text{LacI}_4.\text{alac}_2$                               | $k_{ba} \text{LacI}_4 \cdot \text{alac} \cdot (\text{alac} - 1), k_{da} \text{LacI}_4.\text{alac}_2$        |
| 17              | $\text{LacI}_4.\text{alac}_2 + 2 \text{alac} \rightleftharpoons \text{LacI}_4.\text{alac}_4$                 | $k_{ba} \text{LacI}_4 \cdot \text{alac}_2 \cdot (\text{alac}_2 - 1), k_{da} \text{LacI}_4.\text{alac}_4$    |
| 18              | $\text{LacY.lac}_e \rightarrow \emptyset$                                                                    | $k_{deg} \text{LacY.lac}_e$                                                                                 |
| 19              | $\text{LacZ.lac} \rightarrow \emptyset$                                                                      | $k_{deg} \text{LacZ.lac}$                                                                                   |
| 20              | $\text{LacI}_4.\text{alac}_2 \rightarrow \emptyset$                                                          | $k_{deg} \text{LacI}_4.\text{alac}_2$                                                                       |
| 21              | $\text{LacI}_4.\text{alac}_4 \rightarrow \emptyset$                                                          | $k_{deg} \text{LacI}_4.\text{alac}_4$                                                                       |
| 22              | $g_{lacY} \rightleftharpoons g_{lacY}^*$                                                                     | $k_{gon} g_{lacY}, k_{goff} g_{lacY}^*$                                                                     |
| 23              | $g_{lacZ} \rightleftharpoons g_{lacZ}^*$                                                                     | $k_{gon} g_{lacZ}, k_{goff} g_{lacZ}^*$                                                                     |
| 24              | $g_{lacI} \rightleftharpoons g_{lacI}^*$                                                                     | $k_{gon} g_{lacI}, k_{goff} g_{lacI}^*$                                                                     |
| 25              | $g_{lacY}^? + \text{LacI}_4 \rightleftharpoons g_{lacY}^? \cdot \text{LacI}_4$                               | $k_b g_{lacY}^? \cdot \text{LacI}_4, k_d g_{lacY}^? \cdot \text{LacI}_4$                                    |
| 26              | $g_{lacZ}^? + \text{LacI}_4 \rightleftharpoons g_{lacZ}^? \cdot \text{LacI}_4$                               | $k_b g_{lacZ}^? \cdot \text{LacI}_4, k_d g_{lacZ}^? \cdot \text{LacI}_4$                                    |
| 27              | $g_{lacY}^? + \text{LacI}_4.\text{alac}_2 \rightleftharpoons g_{lacY}^? \cdot \text{LacI}_4.\text{alac}_2$   | $k_{b2} g_{lacY}^? \cdot \text{LacI}_4.\text{alac}_2, k_{d2} g_{lacY}^? \cdot \text{LacI}_4.\text{alac}_2$  |
| 28              | $g_{lacZ}^? + \text{LacI}_4.\text{alac}_2 \rightleftharpoons g_{lacZ}^? \cdot \text{LacI}_4.\text{alac}_2$   | $k_{b2} g_{lacZ}^? \cdot \text{LacI}_4.\text{alac}_2, k_{d2} g_{lacZ}^? \cdot \text{LacI}_4.\text{alac}_2$  |
| 29              | $g_{lacY} \cdot \text{LacI}_4 \rightleftharpoons g_{lacY}^* \cdot \text{LacI}_4$                             | $k_{gon} g_{lacY} \cdot \text{LacI}_4, k_{goff} g_{lacY}^* \cdot \text{LacI}_4$                             |
| 30              | $g_{lacZ} \cdot \text{LacI}_4 \rightleftharpoons g_{lacZ}^* \cdot \text{LacI}_4$                             | $k_{gon} g_{lacZ} \cdot \text{LacI}_4, k_{goff} g_{lacZ}^* \cdot \text{LacI}_4$                             |
| 31              | $g_{lacY} \cdot \text{LacI}_4.\text{alac}_2 \rightleftharpoons g_{lacY}^* \cdot \text{LacI}_4.\text{alac}_2$ | $k_{gon} g_{lacY} \cdot \text{LacI}_4.\text{alac}_2, k_{goff} g_{lacY}^* \cdot \text{LacI}_4.\text{alac}_2$ |
| 32              | $g_{lacZ} \cdot \text{LacI}_4.\text{alac}_2 \rightleftharpoons g_{lacZ}^* \cdot \text{LacI}_4.\text{alac}_2$ | $k_{gon} g_{lacZ} \cdot \text{LacI}_4.\text{alac}_2, k_{goff} g_{lacZ}^* \cdot \text{LacI}_4.\text{alac}_2$ |
| 33              | $\text{p} \rightarrow \emptyset$                                                                             | $k_u \text{p}$                                                                                              |
