# Supplementary material for: Interplay of Gene Expression Noise and Ultrasensitive Dynamics Affects Bacterial Operon Organization
Source: PubMed Central journal article supplement (PMC3431296; doi:10.1371/journal.pcbi.1002672), 2012-08-30
Supplement: pcbi.1002672.s013.pdf [file pcbi.1002672.s013.pdf]

**Table S8.** Parameter values for detailed *lac* operon simulations.

| Parameter            | Interpretation                                           | Value                  | Units                      |
|----------------------|----------------------------------------------------------|------------------------|----------------------------|
| $k_m$                | Transcription                                            | 0.5808                 | $s^{-1}$                   |
| $k_{mt}$             | LacI Transcription                                       | 0.000167               | $s^{-1}$                   |
| $k_{mdeg}$           | mRNA degradation                                         | 0.00791                | $s^{-1}$                   |
| $k_{tsnY}$           | Translation of LacY                                      | 0.0833                 | $s^{-1}$                   |
| $k_{tsnZ}$           | Translation of LacZ                                      | 0.0500                 | $s^{-1}$                   |
| $k_{deg}$            | Protein dilution                                         | 0.0002                 | $s^{-1}$                   |
| $k_{lacI}$           | LacI dimerization                                        | 0.167                  | $\Omega/(\# \times s)$     |
| $k_{bl}$             | LacY-lac <sub>e</sub> binding                            | $5.00 \times 10^{-05}$ | $\Omega/(\# \times s)$     |
| $k_{dl}$             | LacY-lac <sub>e</sub> unbinding                          | 5.00                   | $s^{-1}$                   |
| $k_{perm}$           | lac <sub>e</sub> import                                  | 10.0                   | $s^{-1}$                   |
| $k_{bp}$             | LacZ-lac binding                                         | 0.000563               | $\Omega/(\# \times s)$     |
| $k_{dp}$             | LacZ-lac unbinding                                       | 383                    | $s^{-1}$                   |
| $k_{dp2}$            | lac conversion to alac                                   | 1670                   | $s^{-1}$                   |
| $k_{bp2}$            | alac conversion to lac                                   | 0.00119                | $\Omega/(\# \times s)$     |
| $k_{cat}$            | lac conversion to product                                | 253                    | $s^{-1}$                   |
| $k_u$                | product use and dilution                                 | 1.67                   | $s^{-1}$                   |
| $k_{ba}$             | alac-LacI <sub>4</sub> binding                           | $1.67 \times 10^{-06}$ | $\Omega^2/(\#^2 \times s)$ |
| $k_{da}$             | alac-LacI <sub>4</sub> unbinding                         | 167                    | $s^{-1}$                   |
| $k_{gon}$            | Transcription on                                         | 0.000450               | $s^{-1}$                   |
| $k_{goff}$           | Transcription off                                        | 0.00278                | $s^{-1}$                   |
| $k_b$                | LacI <sub>4</sub> -promoter binding                      | 0.167                  | $\Omega/(\# \times s)$     |
| $k_d$                | LacI <sub>4</sub> -promoter unbinding                    | 0.000244               | $s^{-1}$                   |
| $k_{b2}$             | LacI <sub>4</sub> .alac <sub>2</sub> -promoter binding   | 0.0167                 | $\Omega/(\# \times s)$     |
| $k_{d2}$             | LacI <sub>4</sub> .alac <sub>2</sub> -promoter unbinding | 0.00167                | $s^{-1}$                   |
| $k_u$                | Product utilization                                      | 1.67                   | $s^{-1}$                   |
| lac <sub>e</sub> (0) | Extracellular lactose (lac <sub>e</sub> )                | 835                    | #                          |
