# Supplementary material for: Interplay of Gene Expression Noise and Ultrasensitive Dynamics Affects Bacterial Operon Organization
Source: PLoS Comput Biol. 2012 Aug 30;8(8):e1002672. doi: 10.1371/journal.pcbi.1002672 (PMC3431296; doi:10.1371/journal.pcbi.1002672)
Supplement: Table S2 — Essential and nonessential subsets of gene pairs both have significantly high fractions of same-operon pairs f. (PDF) [file pcbi.1002672.s007.pdf]

**Table S2.** Essential and nonessential subsets of gene pairs both have significantly high fractions of same-operon pairs  $f$ . The analysis was performed only for cases showing higher than random same-operon membership.

| Network module              | Number of essential cases | $f_{\text{essential}}^*$ | $f_{\text{essential}}^{\text{rand}}$ | Number of nonessential cases | $f_{\text{nonessential}}^*$ | $f_{\text{nonessential}}^{\text{rand}}$ |
|-----------------------------|---------------------------|--------------------------|--------------------------------------|------------------------------|-----------------------------|-----------------------------------------|
| A. Linear metabolic pathway | 139                       | 0.029**                  | 0.0094                               | 399                          | 0.033**                     | 0.0065                                  |
| B. Covalent modification    | 0                         | ND                       | ND                                   | 9                            | 0.67                        | ND                                      |
| C. Physical interaction     | 157                       | 0.19**                   | 0.0070                               | 398                          | 0.29**                      | 0.0053                                  |

\* Essential and nonessential gene subsets as designated by Taniguchi *et al* (2010).

\*\*  $p < 10^{-6}$  compared to  $f^{\text{rand}}$ .

ND: insufficient data for analysis.
